# Supplementary material for: In Vivo Confocal Microscopy in Limbal Stem Cell Deficiency After Mesenchymal Stem Cell Transplantation: A Sub-analysis from a Phase I–II Clinical Trial
Source: Springer Nature journal article supplement (doi:10.1007/s40123-023-00809-7), 2023-09-29

## **SUPPLEMENTARY MATERIAL**

### ***In vivo* Confocal Microscopy in Limbal Stem Cell Deficiency after Mesenchymal Stem Cell Transplantation: A Sub-analysis from a Phase I–II Clinical Trial**

Inmaculada Pérez, PhD;<sup>1</sup> Sara Galindo, PhD;<sup>1,2,3</sup> Alberto López-Miguel, PhD;<sup>1,4</sup> Teresa Nieto-Miguel, PhD;<sup>1,2,3</sup> Ana de la Mata PhD;<sup>1,2</sup> Marina López-Paniagua, PhD;<sup>1,2,5</sup> Mercedes Alberca, PhD;<sup>6</sup> José M. Herreras, MD, PhD;<sup>1,2,4</sup> Margarita Calonge, MD, PhD.<sup>1,2,4</sup>

<sup>1</sup>IOBA (Institute of Applied Ophthalmobiology), Universidad de Valladolid, Valladolid, Spain.

<sup>2</sup>CIBER-BBN (Biomedical Research Networking Center in Bioengineering, Biomaterials and Nanomedicine). Carlos III National Institute of Health, Valladolid, Spain.

<sup>3</sup>Department of Cell Biology, Genetics, Histology and Pharmacology, Universidad de Valladolid, Valladolid, Spain.

<sup>4</sup>Departamento de Cirugía, Oftalmología, Otorrinolaringología y Fisioterapia, Facultad de Medicina, Universidad de Valladolid, Valladolid, Spain.

<sup>5</sup>Centro en Red de Medicina Regenerativa y Terapia Celular de Castilla y León, Valladolid, Spain.

<sup>6</sup>IBGM (Institute of Molecular Biology and Genetics) and University Scientific Park, Universidad de Valladolid, Valladolid, Spain.

**Corresponding author:** Alberto López-Miguel, PhD. IOBA, Universidad de Valladolid, Campus Miguel Delibes, Paseo Belén, 17. E-47011 Valladolid, Spain

E-mail: [alopezm@ioba.med.uva.es](mailto:alopezm@ioba.med.uva.es)

**Figure 1S. A representative example of successful improvement of central cornea epithelial phenotype and unsuccessful limbal improvement in a mesenchymal stem cell transplantation (MSCT) case.** The left panels show slit-lamp biomicroscopy images during baseline and 12 months after MSCT. In vivo confocal microscopy (IVCM) images of the central cornea show an improvement from a conjunctival-like to a mixed epithelial phenotype before and after surgery, respectively. However, IVCM images of the limbus show an absence of transition zones (nasal quadrant) and palisades of Vogt (inferior quadrant) during baseline and 12 months after MSCT surgery.

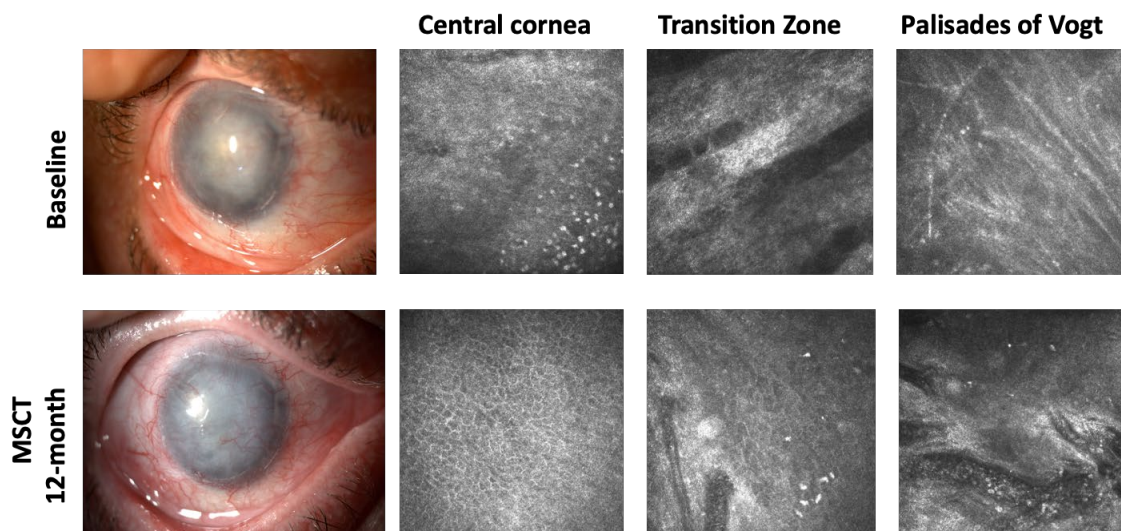

**Figure 2S. A representative example of successful improvement of central cornea epithelial phenotype and unsuccessful limbal improvement in a cultivated limbal epithelial transplantation (CLET) case.** Left panels show slit-lamp biomicroscopy images before and 12 months after CLET surgery. Central cornea in vivo confocal microscopy (IVCM) images show an improvement from a conjunctival-like to a mixed epithelial phenotype 12 months after surgery. In contrast, limbal IVCM images obtained before and 12 months after CLET surgery do not show the presence of a transition zone (nasal quadrant) or palisades of Vogt (inferior quadrant).

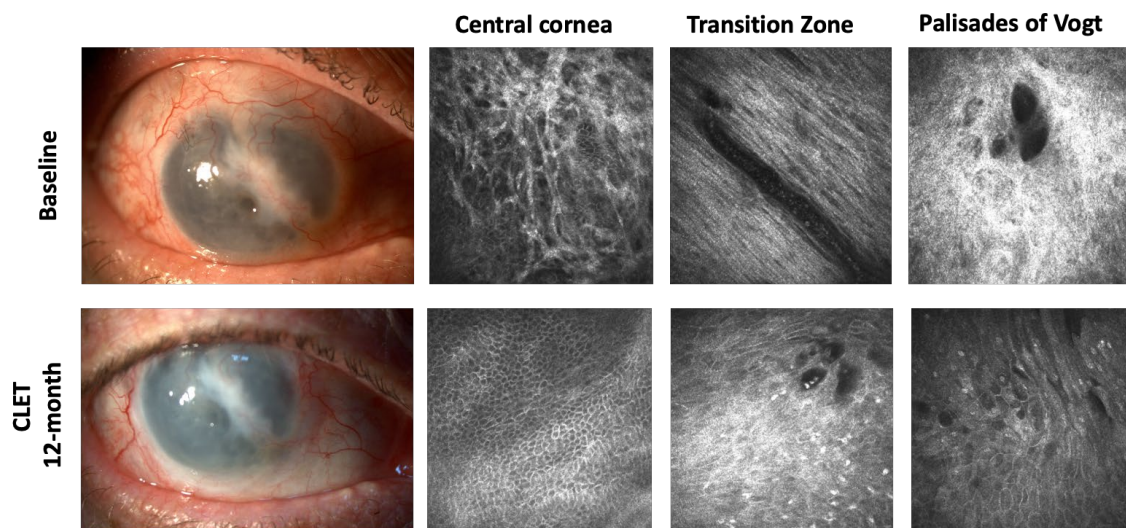

Supplement: MOESM1 [file 26104746]
